# Supplementary material for: Yy1 Gene Dosage Effect and Bi-Allelic Expression of Peg3
Source: PubMed Central journal article supplement (PMC4361396; doi:10.1371/journal.pone.0119493), 2015-03-16
Supplement: pone.0119493.s004.pdf [file pone.0119493.s004.pdf]

**Supplementary Table 1. Primer sets used for genotyping experiments.**

| <b>Locus</b>   | <b>Name</b>                  | <b>Sequence (5' -&gt; 3')</b>                           | <b>Primer set</b> | <b>Size (bp)</b> | <b>*Position (mm9, NCBI Build 37)</b> |
|----------------|------------------------------|---------------------------------------------------------|-------------------|------------------|---------------------------------------|
| YY1(Exon1 del) | YY1 CoKO F<br>YY1 genotype R | ACCTGGTCTATCGAAAGGAAGCAC<br>TCATCCAAAGTTCGAAACCTGCTTTCC | 1st primer        | ≈290             | Chr12:108,791,900-108,795,566         |
| Zp3-cre        | Zp3 F<br>oIMR1085            | TAGGAATCACGTGGAGTGTCT<br>GTGAAACAGCATTGCTGTCACTT        | 1st primer        | 500              | Chr5:135,979,920-unknown              |
| CoKO           | Peg3-5 arm<br>Peg3-Lar3      | CCCTCAGCAGAGCTGTTTCCTGCC<br>CAACGGGTTCTTCTGTTAGTCC      | 1st primer        | ≈510             | chr7:6,630,678-6,634,867              |
| DelKO          | Peg3-5 arm<br>Peg3-LoxR      | CCCTCAGCAGAGCTGTTTCCTGCC<br>TGAAGTATGGCGAGCTCAGACC      | 1st primer        | ≈505             | chr7:6,904,937-6,912,835              |
| Y chromosome   | mSry-F<br>mSry-R             | GTCCCGTGGTGAGAGGCACAAG<br>GCAGCTCTACTCCAGTCTTGCC        | 1st primer        | 318              | chrY:1,919,207-1,919,524              |
| Flippase       | oIMR0853-F<br>oIMR0852-R     | GCGAAGAGTTTGTCTCAACC<br>AAAGTCGCTCTGAGTTGTTAT           | 1st primer        | ≈330             | Chr6:113,076,214-unknown              |
