# Supplementary material for: Yy1 Gene Dosage Effect and Bi-Allelic Expression of Peg3
Source: PubMed Central journal article supplement (PMC4361396; doi:10.1371/journal.pone.0119493), 2015-03-16
Supplement: pone.0119493.s005.pdf [file pone.0119493.s005.pdf]

**Supplementary Table 2. Primer sets used for RT-PCR and qRT-PCR experiments.**

| <b>Locus</b> | <b>Name</b>                             | <b>Sequence (5' -&gt; 3')</b>                      | <b>Primer set</b> | <b>Size (bp)</b> | <b>*Position (mm9, NCBI Build 37)</b> |
|--------------|-----------------------------------------|----------------------------------------------------|-------------------|------------------|---------------------------------------|
| Peg3 3-6     | Peg3-RT-exon3-F2<br>Peg3-RT-126-2       | ATCCCTGAAACGCTCAAGCCCT<br>AAGATCCCGTTGAGGCAGCC     | 1st primer        | 291(289)         | chr7:6,668,849-6,671,234              |
| Peg3 1-4     | Peg3-RT-1a<br>Peg3-RT-124               | GGTTCAGTGTGGGTGCACTAGACT<br>TGTCACTGTTGGTGTCTCT    | 1st primer        | 304(301)         | chr7:6,670,582-6,683,038              |
| Beta gal     | Peg3-RT-exon3-F2<br>Peg3-RT-βgal-pseudo | ATCCCTGAAACGCTCAAGCCCT<br>GAAGGCTGTGCGAGGCCGCTTG   | 1st primer        | ≈310             | chr7:6,668,849-6,671,234              |
| Zim1         | Zim1-RT-c<br>Zim1-RT-d                  | GATCACCAGGTTGGAGCAAGGAGT<br>AGCGCTCTGTGGTGTGTAGTTG | 1st primer        | 405              | chr7:6,630,678-6,634,871              |
| Usp29        | Usp29-RT-PolA<br>Usp29-RT-PolB          | GAGCCTGCAGCCGGACCGT<br>GCTCCGGGGCTTCTGCTCT         | 1st primer        | 233              | chr7:6,904,937-6,912,835              |
| Actin (beta) | bActin-1a<br>bActin-1b                  | GAGCACCTGTGCTGCTCACCGA<br>CTCTTTGATGTCACGCACGATTC  | 1st primer        | 344              | chr5:143,666,183-143,666,981          |
